# Supplementary material
Source: Springer Nature journal article supplement (https://www.springermedizin.de/resource/supplementary/12891_2013_2000_MOESM2_ESM.pdf/9510154)

Number of exercise sessions  
(mean)

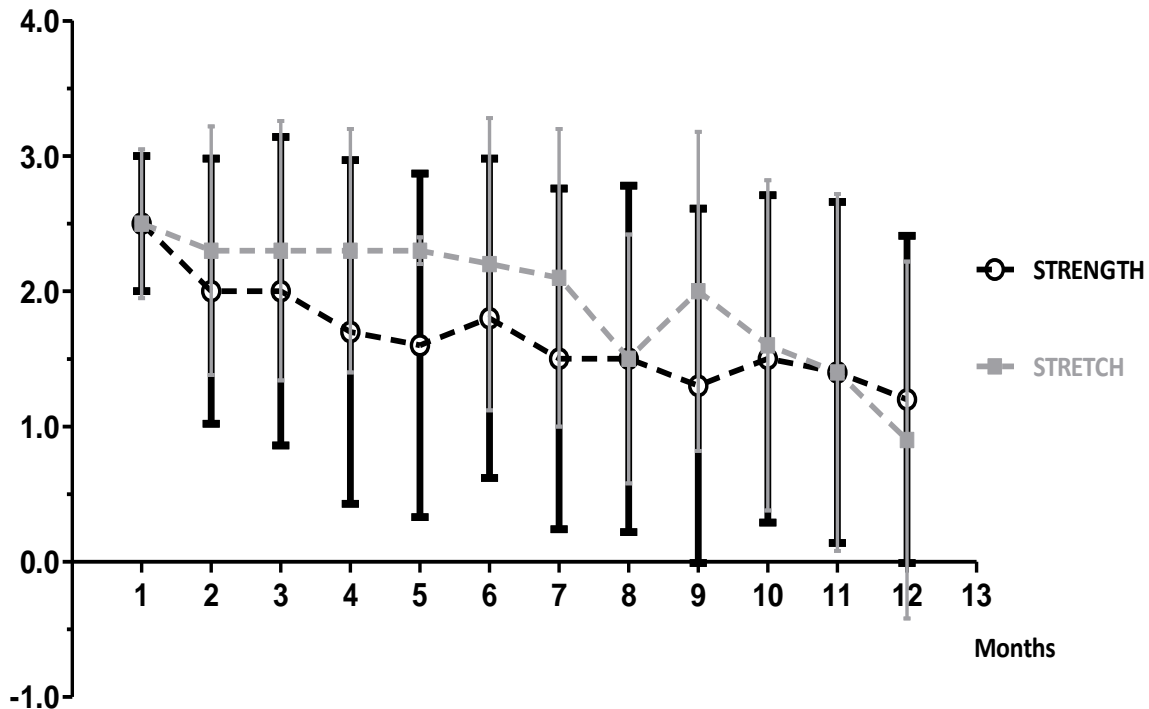

Supplement: MOESM2 [file 9510154]
